# Supplementary material
Source: Research Square preprint supplement (doi:10.21203/rs.3.rs-8916619/v1)
Supplement: Supplementary file 1 [file 93a8477e504c4f59c9e044cf.docx]

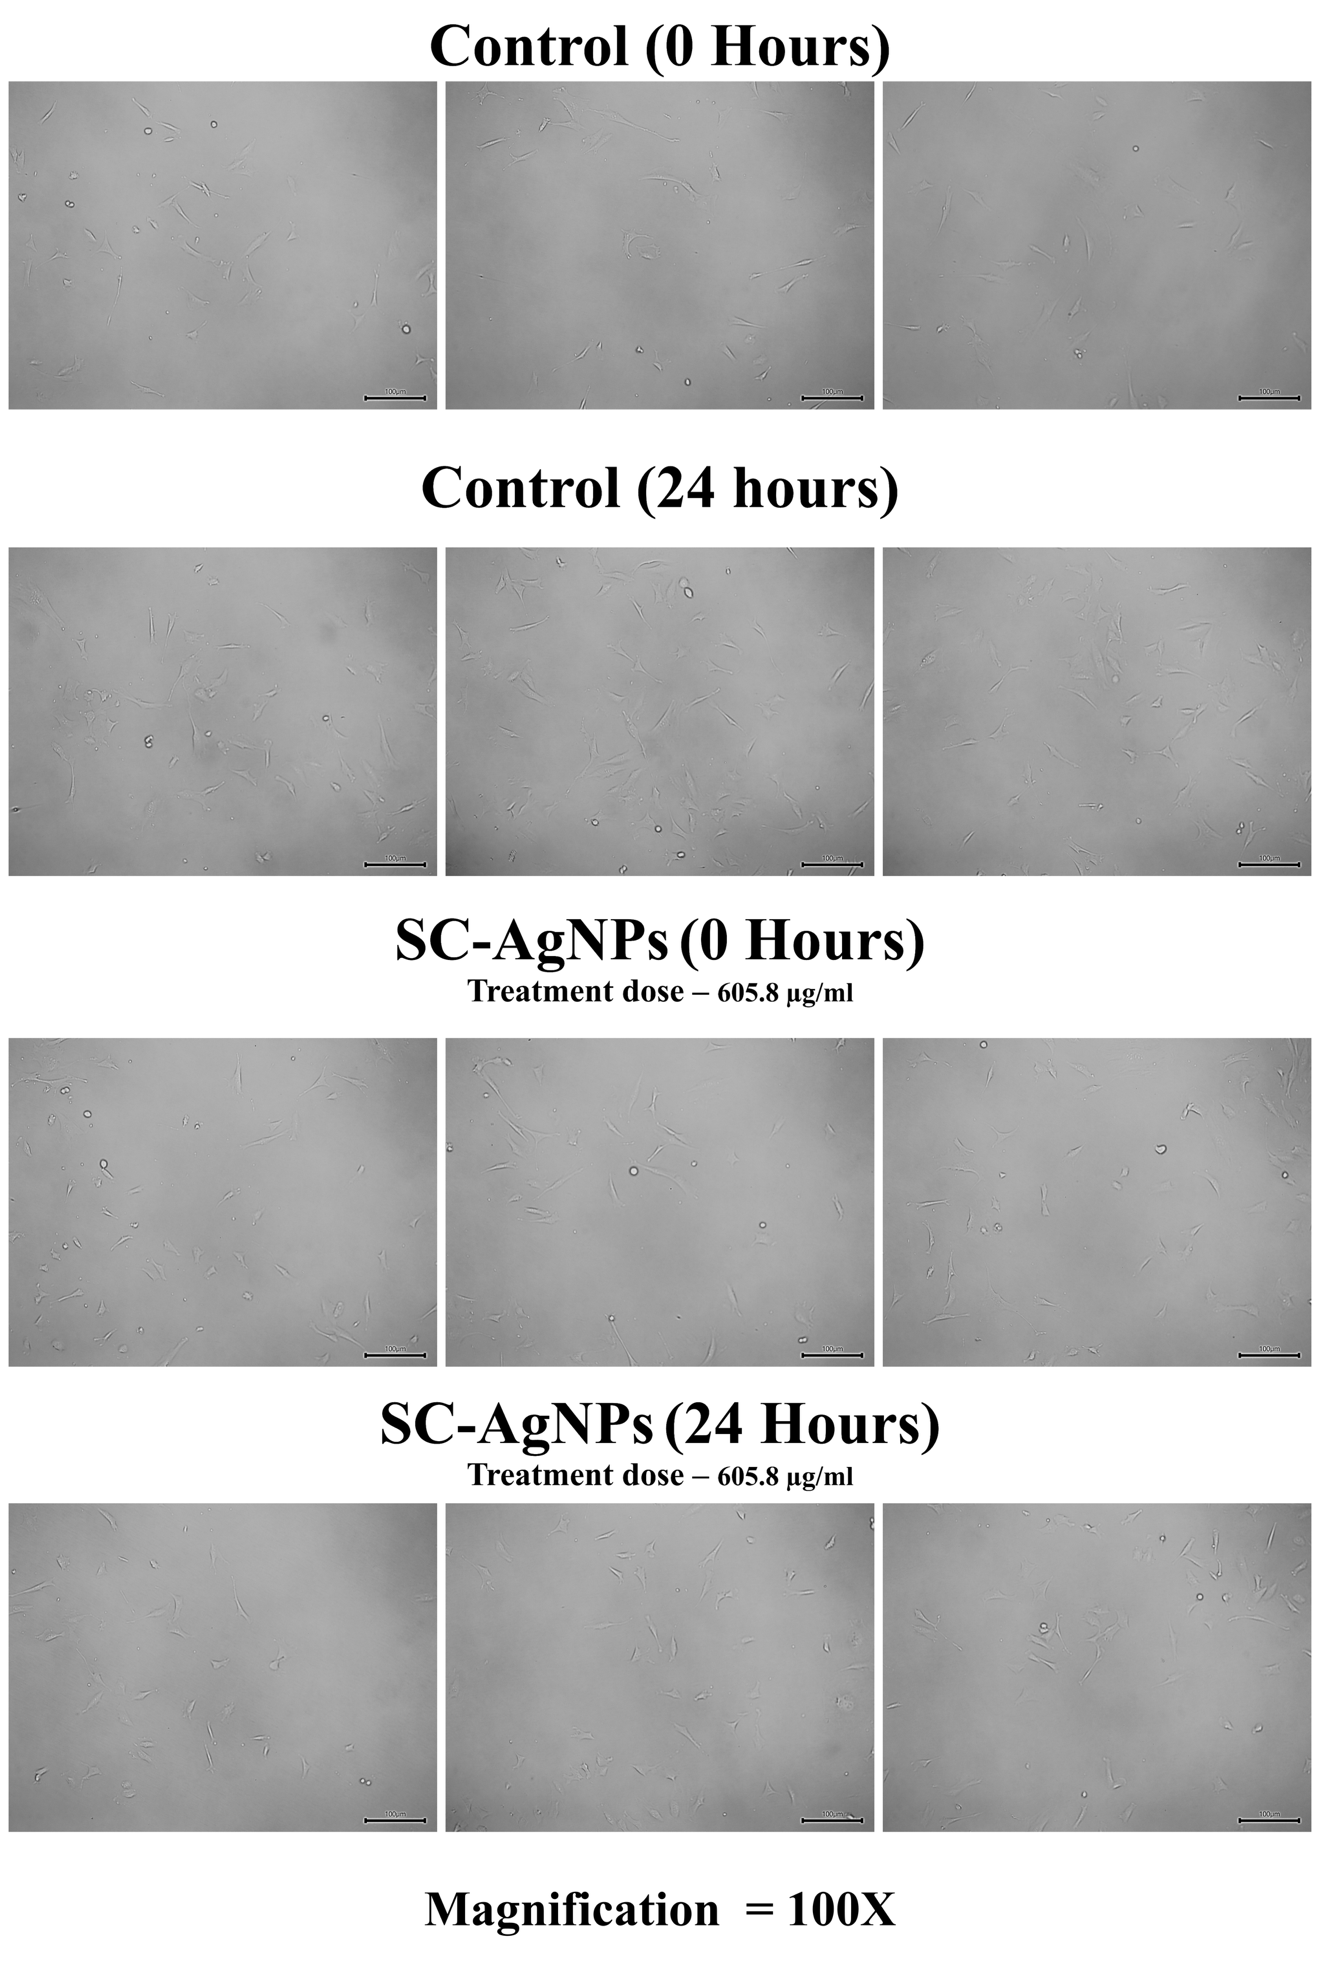


Fig. S1. 3T3-L1 cell line culture and treatement


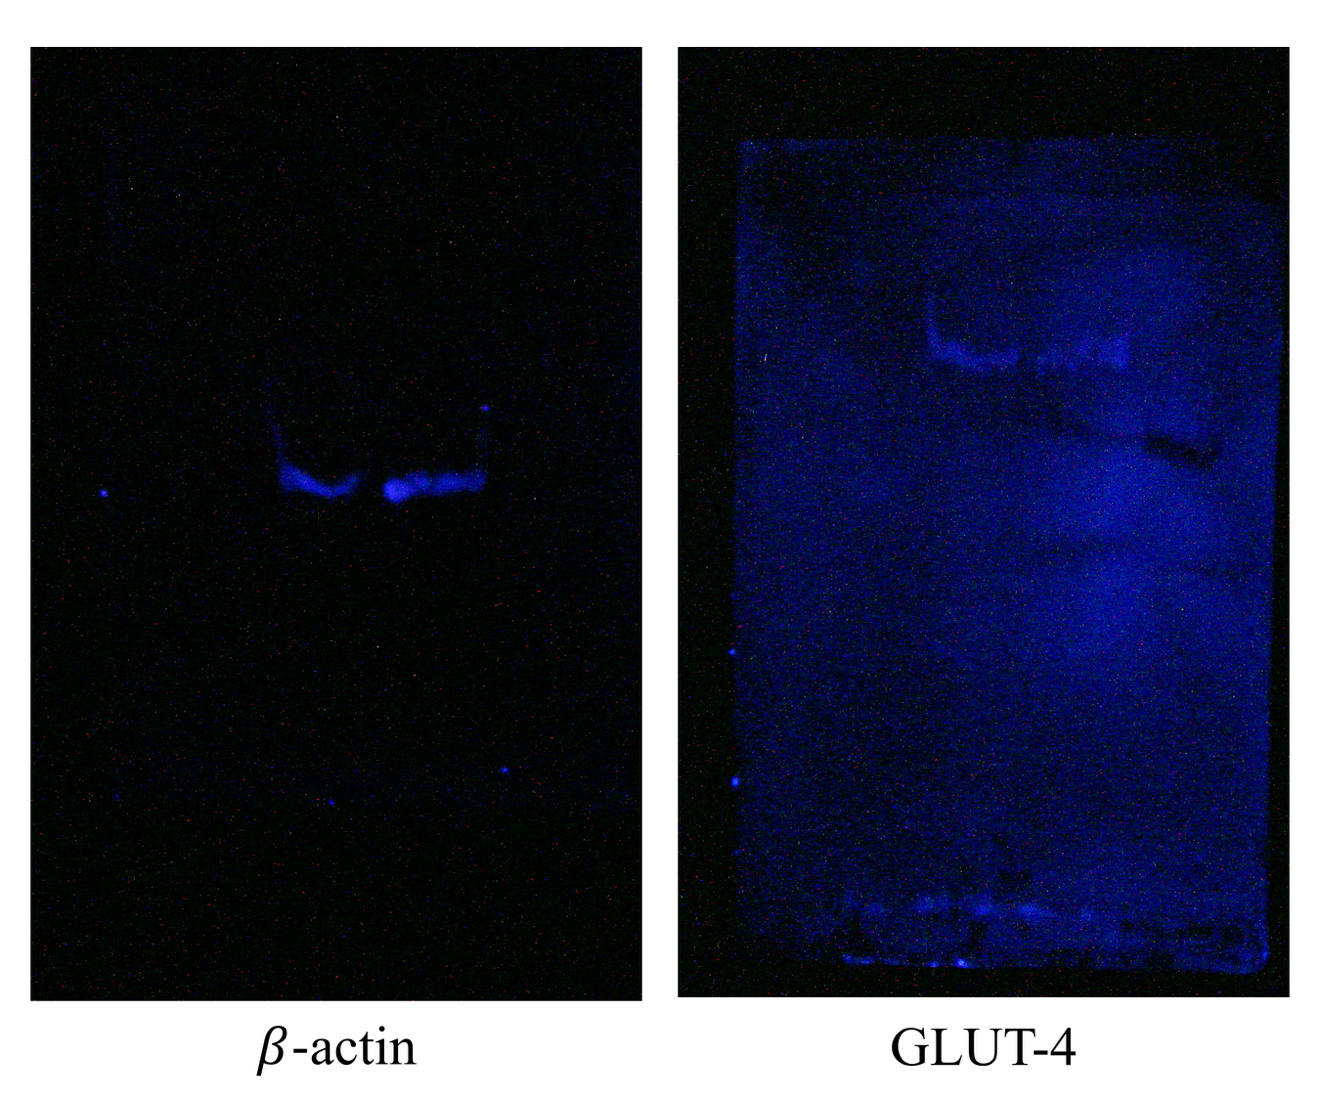


Fig. S2. β-actin and GLUT4 bands from blots.


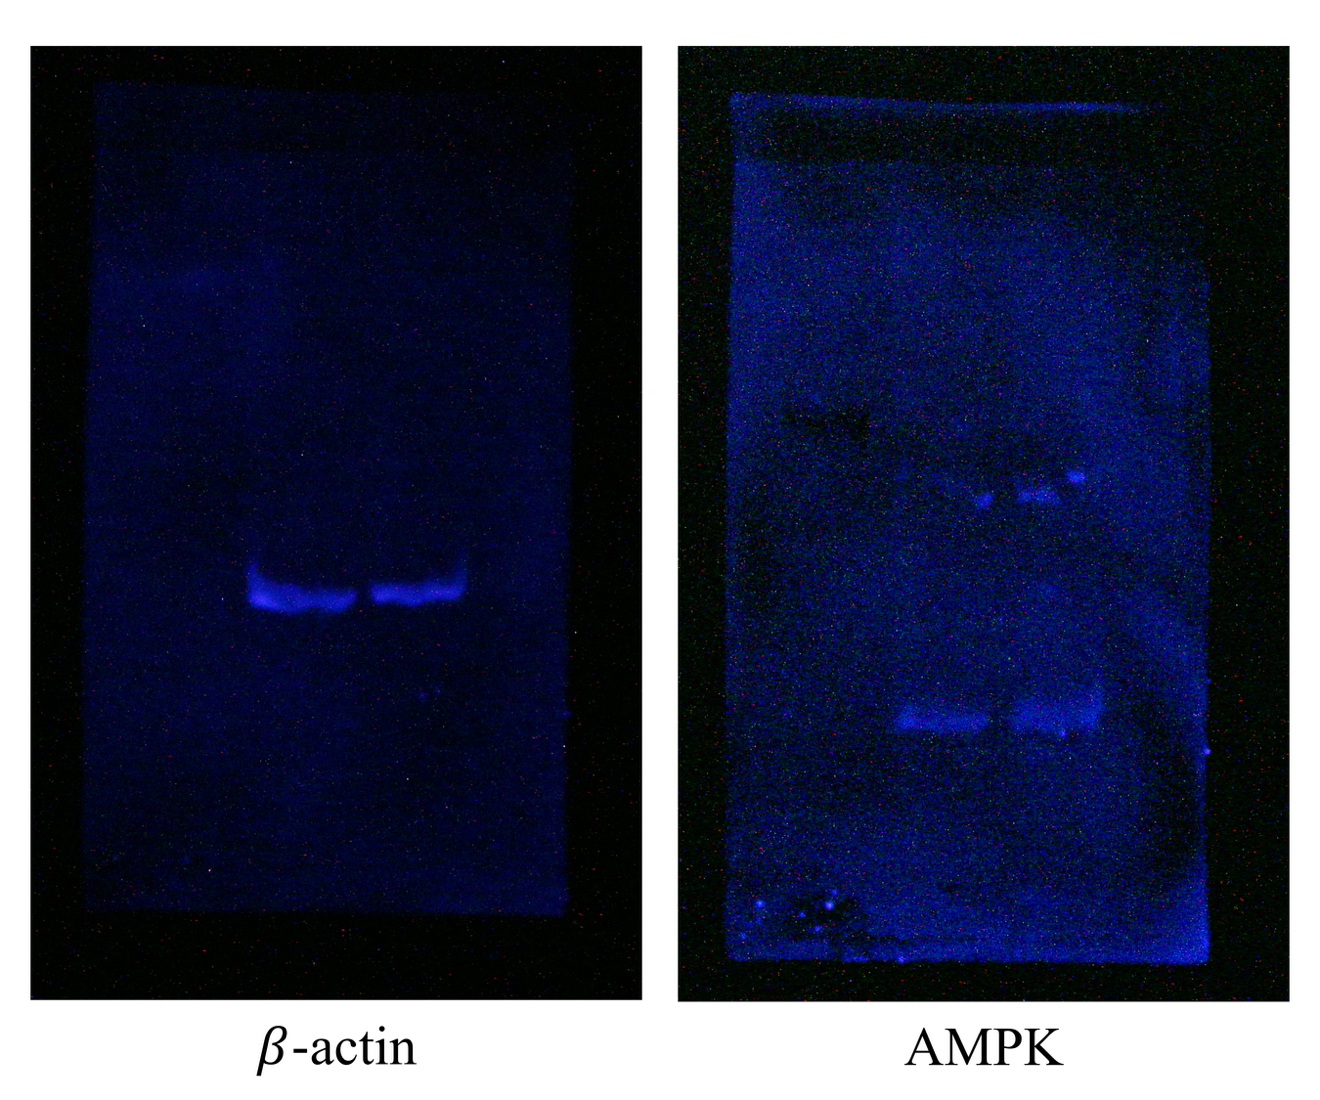


Fig. S3. β-actin and AMPK bands from blots.
